# Supplementary material for: Structural Analysis of the Streptomyces avermitilis CYP107W1-Oligomycin A Complex and Role of the Tryptophan 178 Residue
Source: PubMed Central journal article supplement — Mol Cells. 2016 Feb 16;39(3):211–6. doi: 10.14348/molcells.2016.2226 (PMC4794603; doi:10.14348/molcells.2016.2226), 2016-02-16

## Supplemental Data

**Figure S1.** The stereo figure of the OMIT 2fofc map of the bound OliA at the active site. 2fofc map (blue) is contoured at  $0.5 \sigma$ . OliA model was superimposed to the OMIT map.

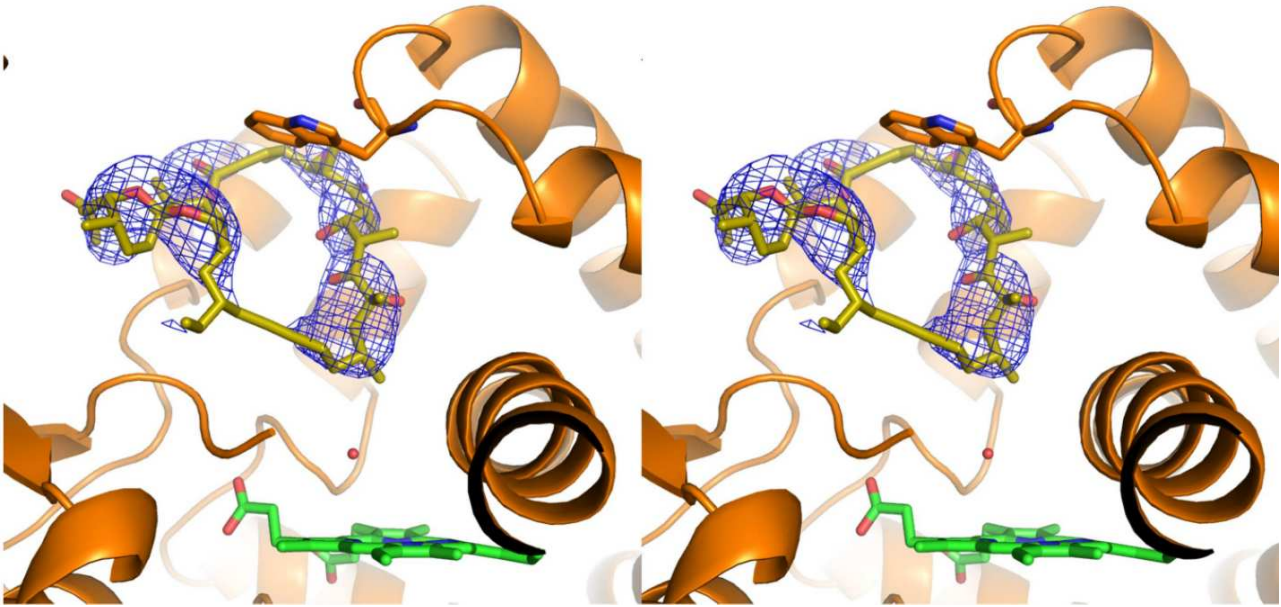

**Figure S2.** The 2fofc map of the bound Heme in the active site. 2fofc map (blue) is contoured at 1.0  $\sigma$ . (A) Upside view. (B) Side view.

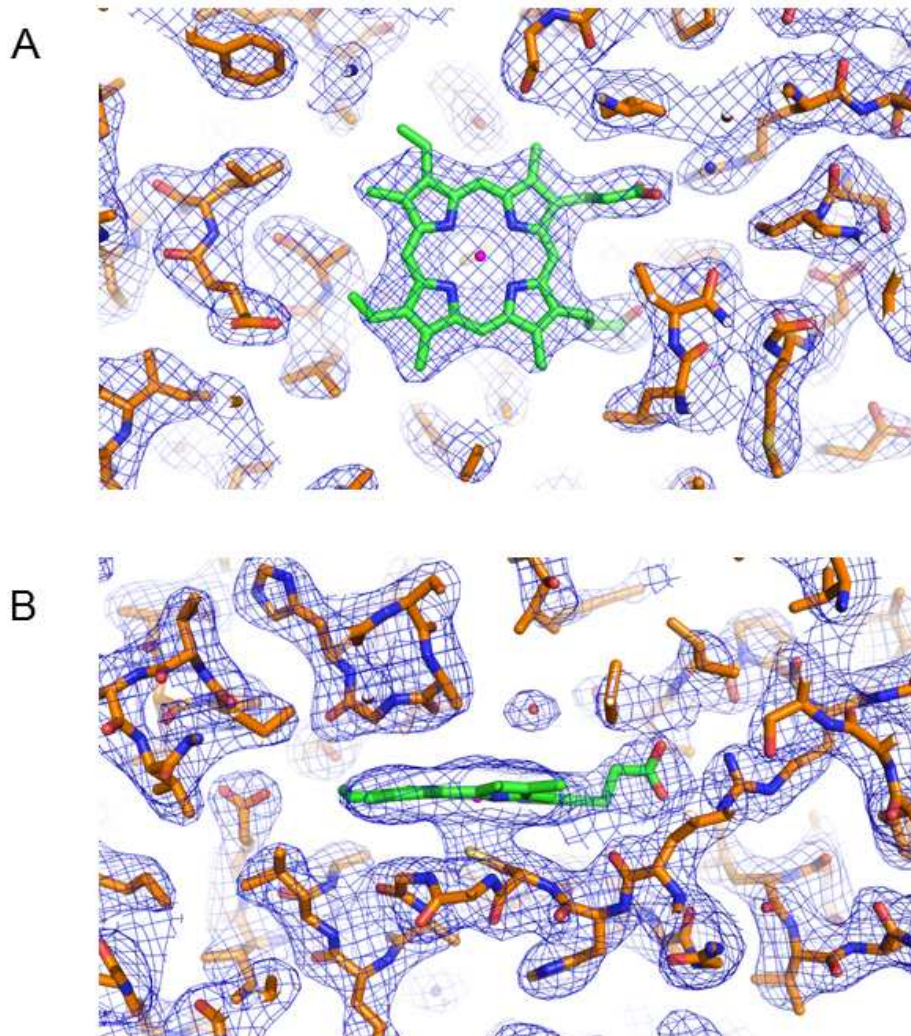

**Figure S3.** CO-binding spectra of purified W178G mutant enzyme of CYP107W1. (A) Whole cell level. (B) Final purified P450 enzyme.

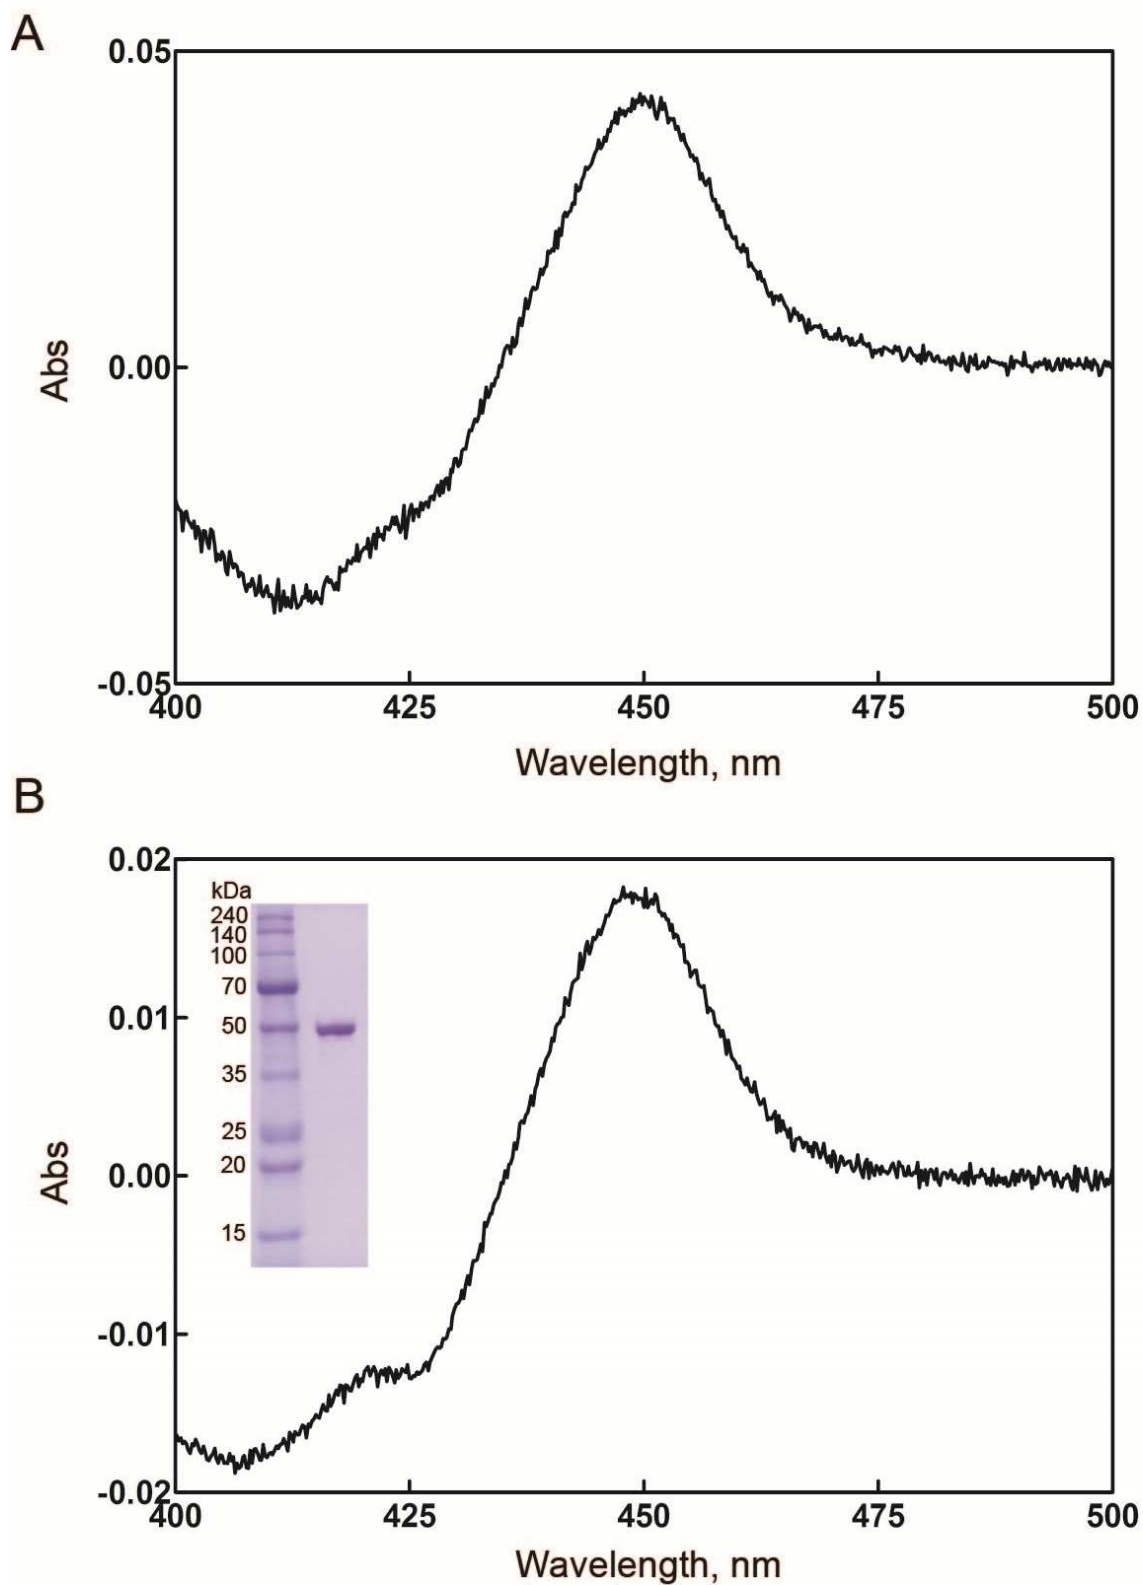

**Figure S4.** Substrate binding modes of P450 structures in complex with macrolides. The root-mean-square deviation (RMSD) of the CYP107W1-oligomycin A structure (purple) with the CYP105P1 structure (dark green) was 1.296 Å for 1,859 C $\alpha$  atoms and with MycG (salmon), 1.090 Å for 1,958 C $\alpha$  atoms.

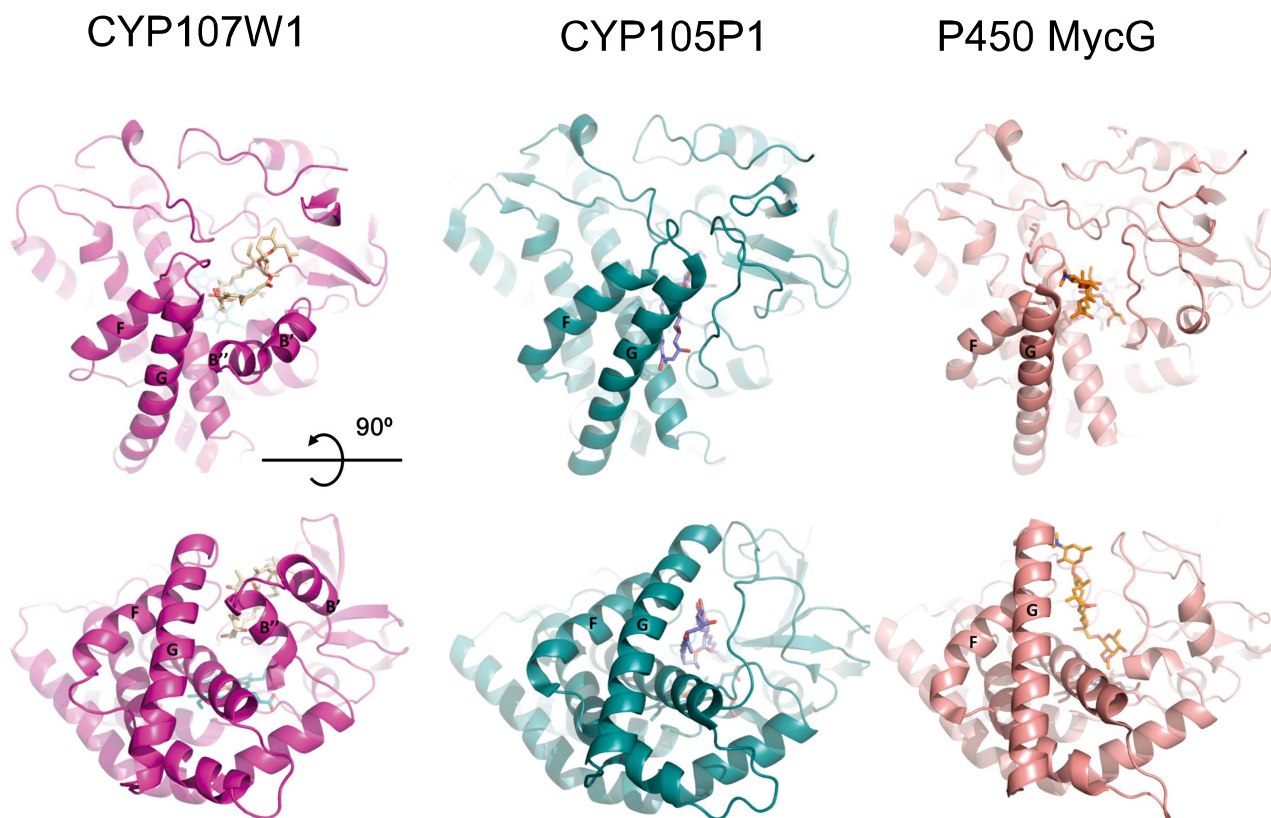

Supplement: molce-39-3-211-supple.pdf [file molce-39-3-211-supple.pdf]
